# Supplementary material
Source: ML conference proceedings conference paper supplement (https://openreview.net/forum?id=u6ybkty-bL)

Frequency Of Maximum F1 Scores When Predicting Synthetic Data

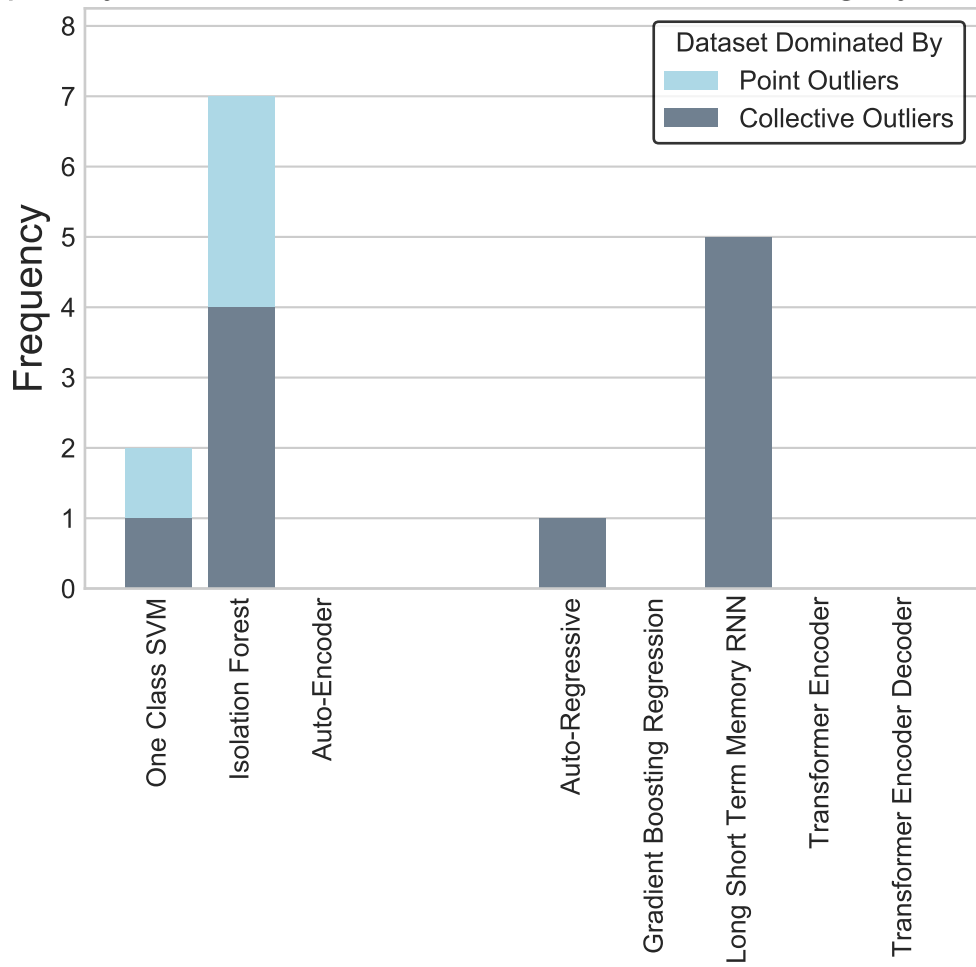

Supplement: supplementary_material [file attachment]

# Distribution Of AUC-ROC For Each Synthetic Dataset

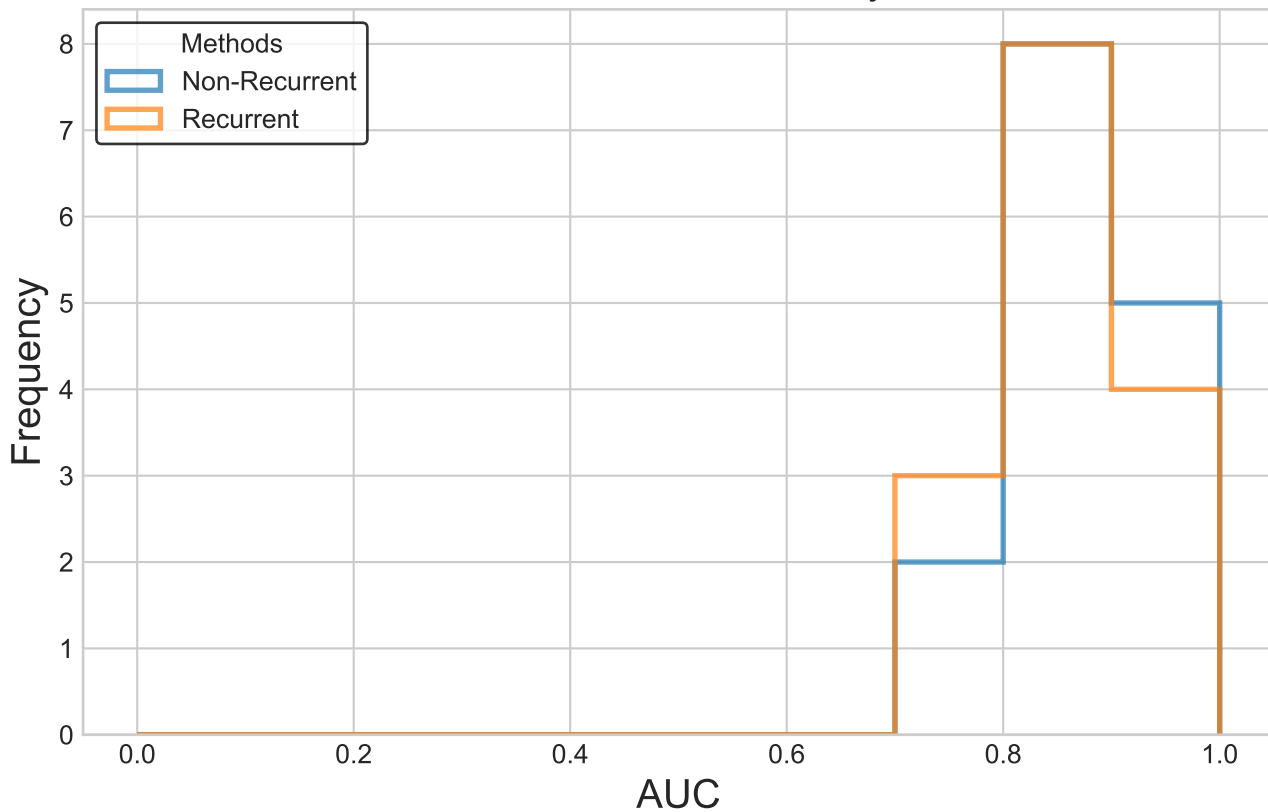

Supplement: supplementary_material [file attachment]

Maximum F1 Score On Water Quality Data

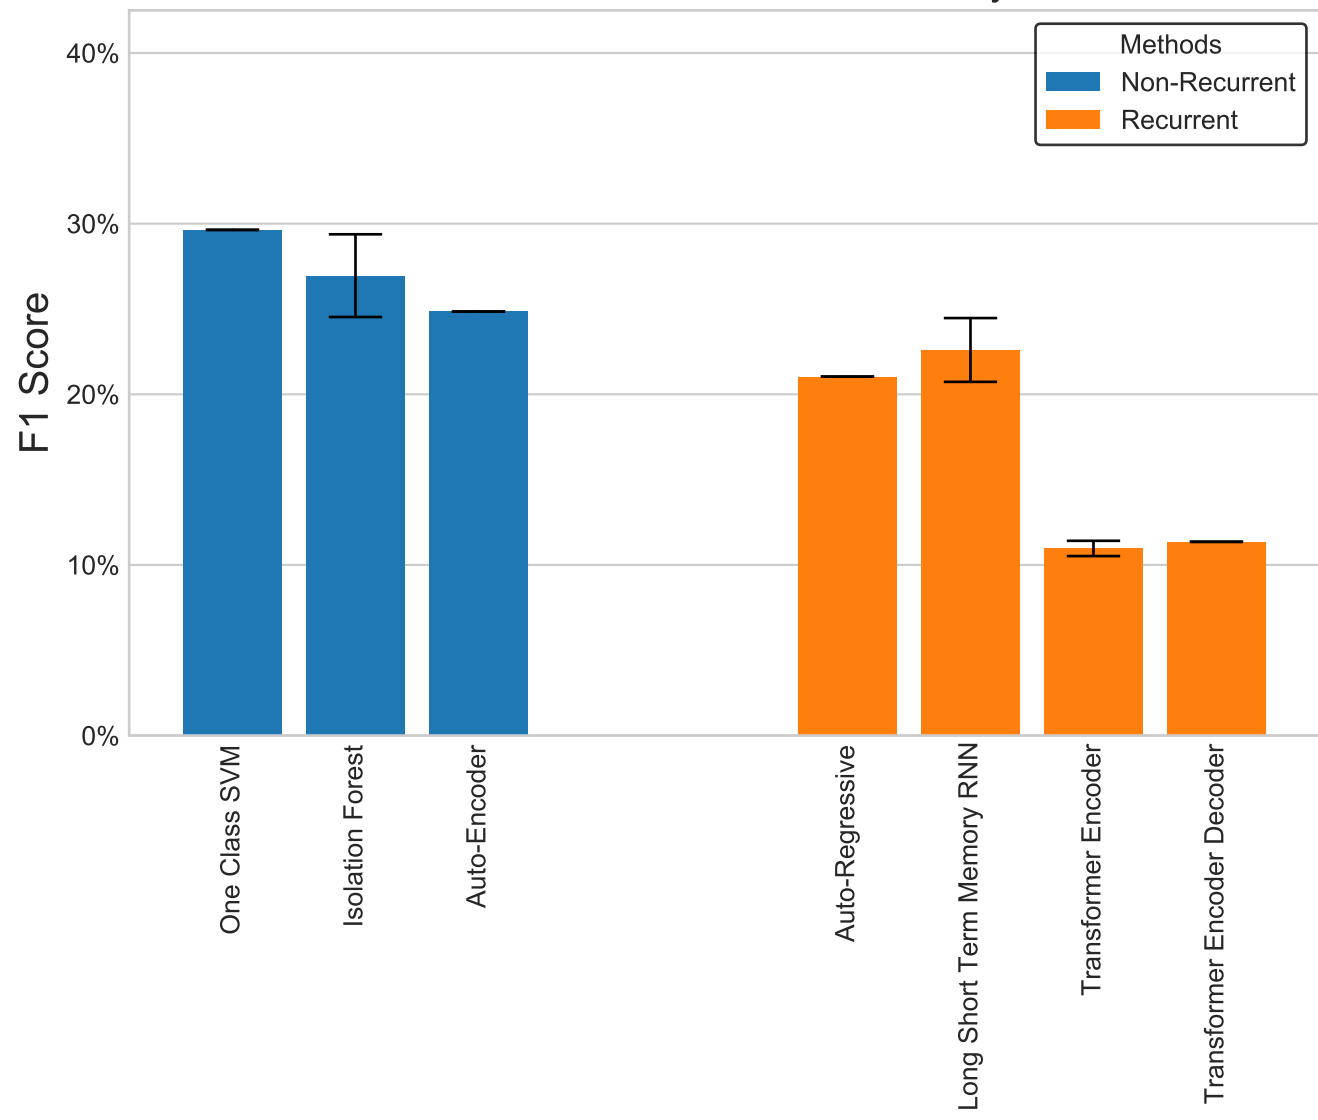

Supplement: supplementary_material [file attachment]

Maximum F1 Score On SWAN-SF Data

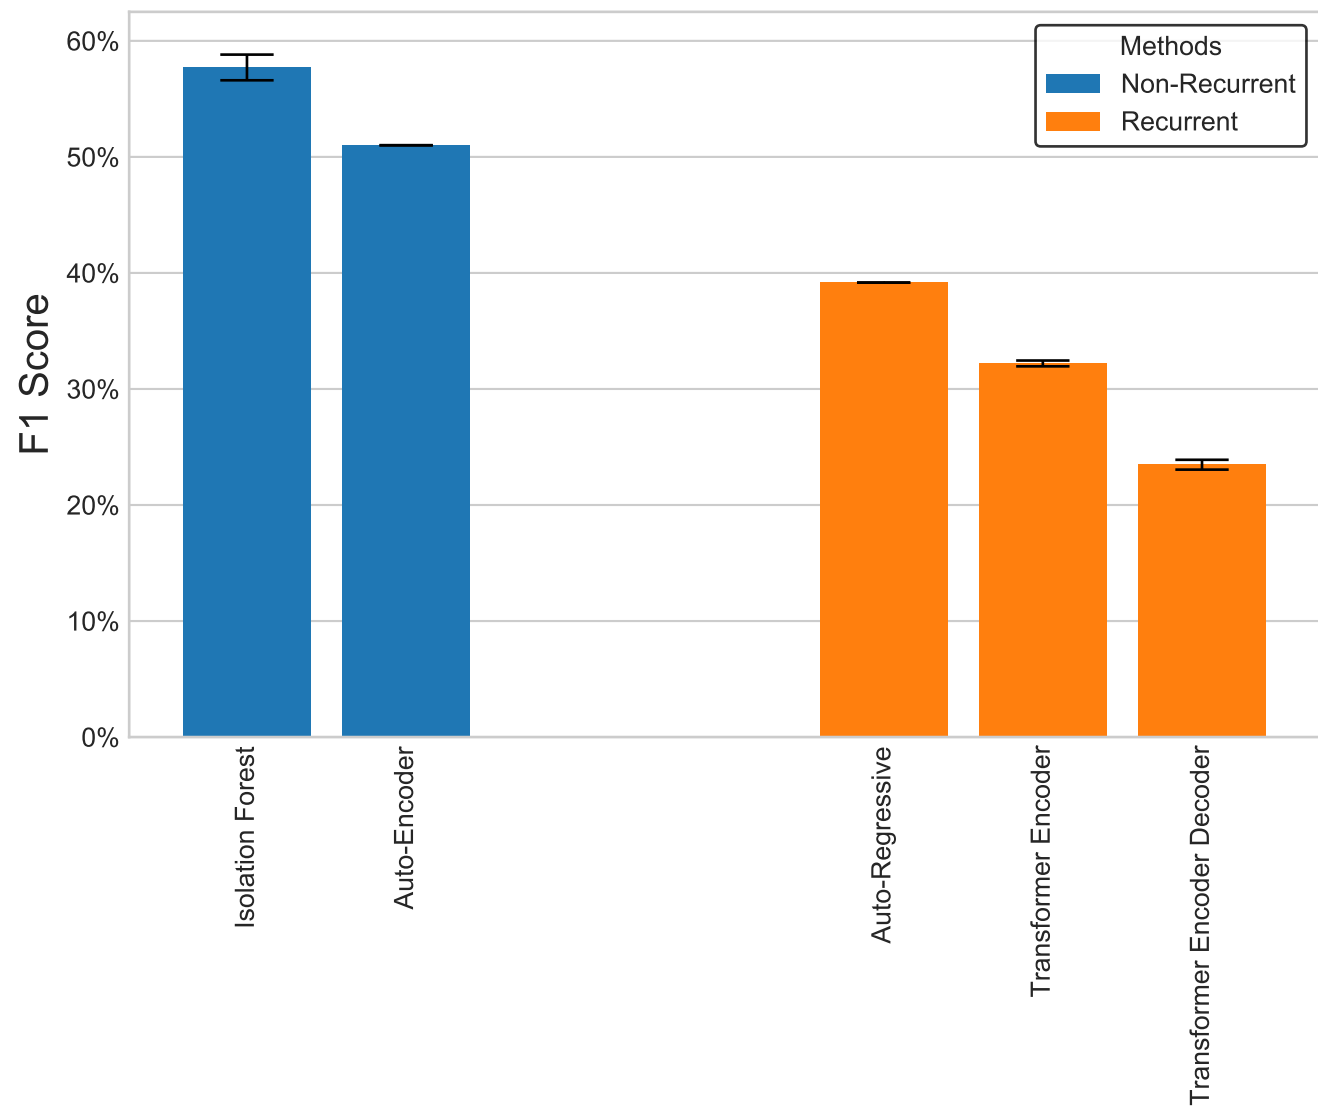

Supplement: supplementary_material [file attachment]

Frequency Of Maximum F1 Scores When Predicting Synthetic Data

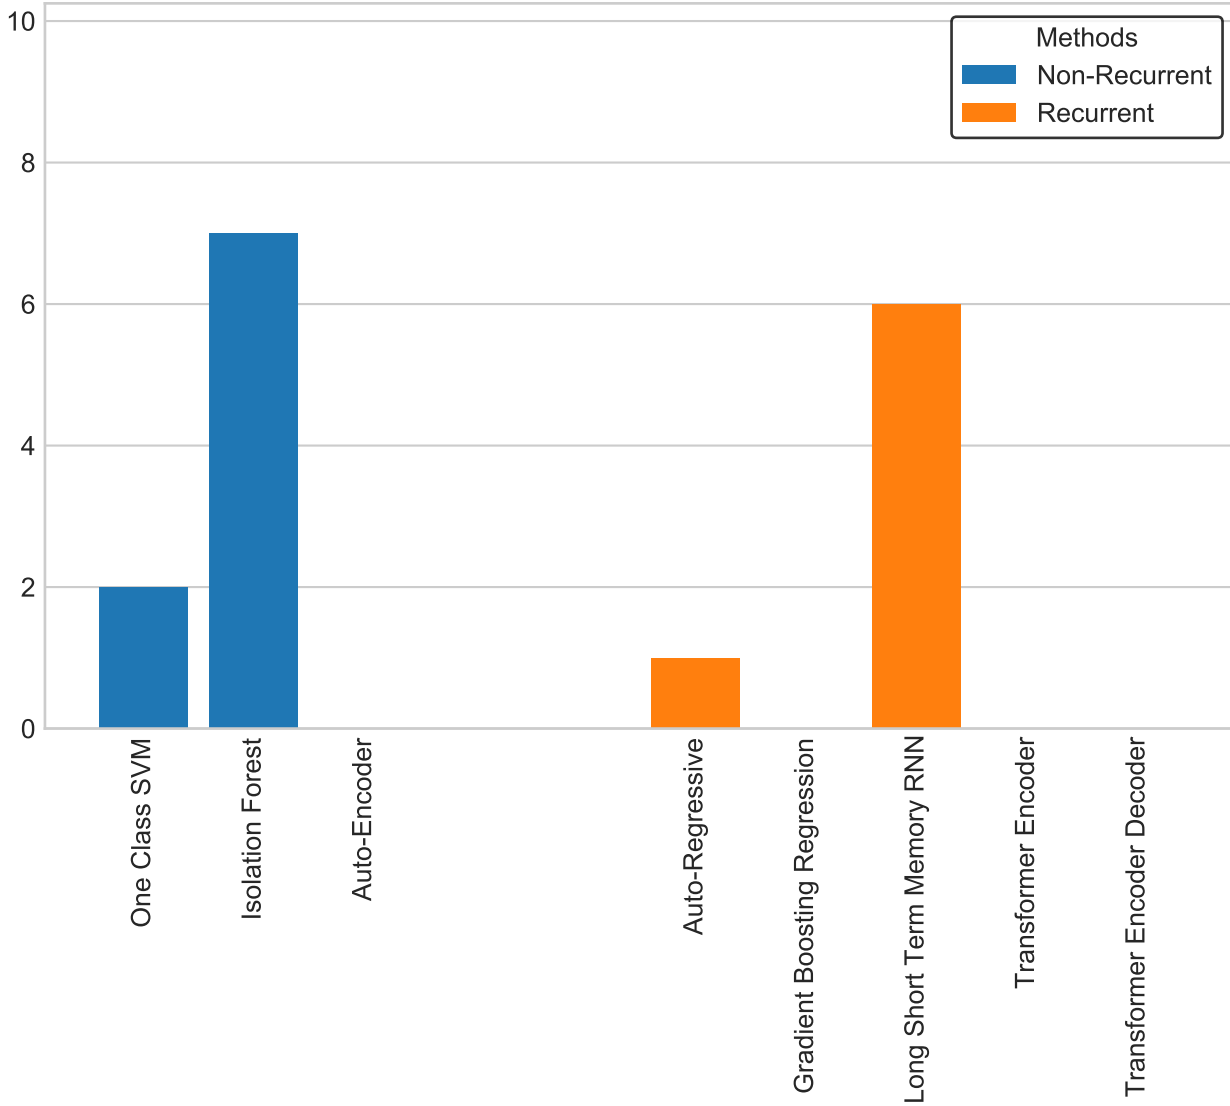

Supplement: supplementary_material [file attachment]

# Distribution Of Maximum F1 Score For Each Synthetic Dataset

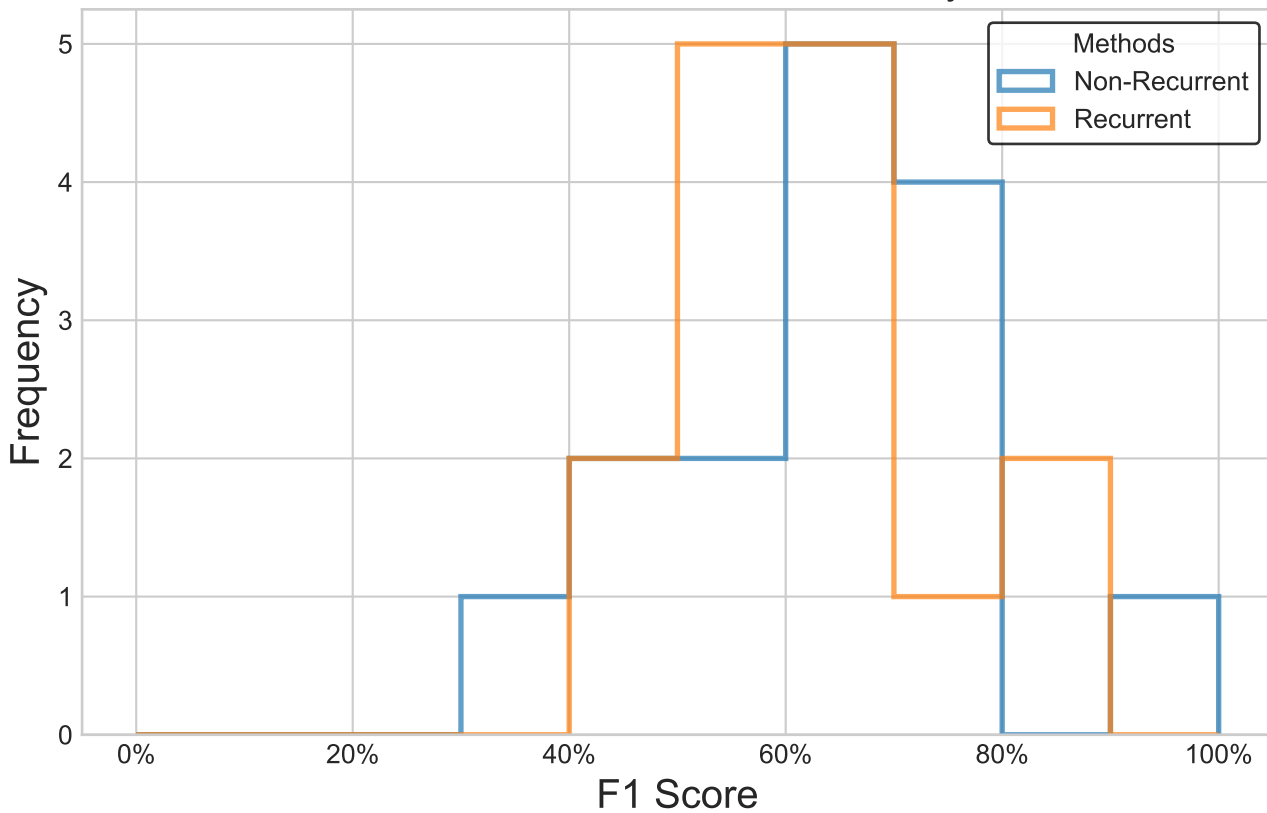

Supplement: supplementary_material [file attachment]
